# Supplementary material
Source: PubMed Central journal article supplement (PMC2665901)
Supplement: blood-2008-05-160325_2.pdf [file blood-2008-05-160325_2.pdf]

| <b>Gene</b> | <b>Primer sequence</b>                       |
|-------------|----------------------------------------------|
| EPB41-F     | 5' - GCTGTCGATTTCGGCAGACCGAAGTCCTCGGCCC - 3' |
| EPB41-R     | 5' - TCCTGTGGGGATTTGCCCATTTGATGTTAAG - 3'    |
| ARFIP1-F    | 5' - CCATCTGGACTTGGTCTCTCA - 3' tgagag       |
| ARFIP1-R    | 5' - TGGTCCACTTTTTGTCTGTGTT - 3'             |
| ATP11C-F    | 5' - TCAGCCTGTTCCCTGAGATT - 3'               |
| ATP11C-R    | 5' - GGCAGTTCAAGATTCGGATT - 3'               |
| HNRPLL-F    | 5' - AAACGAAGAAGGGTGTCTCC - 3'               |
| HNRPLL-R    | 5' - AAACCATATTTGGGAAGACGA - 3'              |
| MBNL2-F     | 5' - TCTTTAACCCAGCGTCTTG - 3'                |
| MBNL2-R     | 5' - CCATTCCGTTTCTGCTGATT - 3'               |
| PLD1-F      | 5' - ATCAGCAGCATTGACAGCAC - 3'               |
| PLD1-R      | 5' - CAGCTCTCCACACCTGTCT - 3'                |
| SNRP70-F    | 5' - TCAGGAAAGCCCCGTGGCTATGCCTTCATC - 3'     |
| SNRP70-R    | 5' - CTAGCCGCCGGGGCCTCCAGCCCTTCACGGTTC - 3'  |
| GCNT2-F1    | 5' - CCTGGTCCAAGGACACCTAC - 3'               |
| GCNT2-F2    | 5' - TCCCCCTGAAAACCAACAAGGA - 3'             |
| GCNT2-F3    | 5' - CCAAAGGGCCATTGATCTACTA - 3'             |
| GCNT2-R1    | 5' - CATTTGGCATAGAGCCAGGA - 3'               |
| SLC12A6-F1  | 5' - CCAGTGACCGGACTTCTCA - 3'                |
| SLC12A6-F2  | 5' - AAGGTAGAGGACCCAGAGGAG - 3'              |
| SLC12A6-R   | 5' - TGTGATGGAGTTCTGACTCAGG - 3'             |
| TNPO2-F1    | 5' - ACGTCGCAAGGATCAAGAAG - 3'               |
| TNPO2-F2    | 5' - TCCTCAAGAAGAGGGCCAGT - 3'               |
| TNPO2-F3    | 5' - TTGGCTCCCTCCTTCCGCGGAG - 3'             |
| TNPO2-R     | 5' - GTTGGGCGACTGTGAGTCTT - 3'               |
